1 **Transient inhibition to light explains stronger V1**  
2 **responses to dark stimuli**

3  
4 **Abbreviated title: Dark dominance from light-driven inhibition**

5  
6  
7 David St-Amand, Curtis L. Baker Jr.

8  
9  
10 McGill Vision Research Unit, Department of Ophthalmology & Visual Sciences, McGill  
11 University, Montreal, Quebec, Canada, H3G 1A4.

12  
13  
14  
15 **\*Correspondence:**

16 Curtis Baker  
17 [curtis.baker@mcgill.ca](mailto:curtis.baker@mcgill.ca)  
18 McGill Vision Research  
19 MUHC Research Institute  
20 1650 Cedar Avenue, L11-521  
21 Montreal, H3G 1A4  
22 Canada

23  
24  
25 **Number of Pages: 47**  
26 **Number of Figures: 7**  
27 **Number of Tables: N/A**  
28 **Number of Movies: N/A**  
29 **Number of Words in the Abstract: 216**  
30 **Number of Words in the Introduction: 511**  
31 **Number of Words in the Discussion: 1469**

32  
33  
34  
35  
36 **Conflict of interest:** The authors declare no competing financial interests

37  
38  
39 **Acknowledgements:** We wish to thank Guangxing Li for contributions to software and  
40 technical support in experiments, and Philippe Nguyen and Amol Gharat for their  
41 important contributions to data collection and spike-sorting. Funded by Canadian  
42 Institutes of Health Research (CIHR) grant MOP-119498 to C.B.

43

44 **Abstract**

45 Neurons in the primary visual cortex (V1) receive excitation and inhibition from distinct  
46 parallel pathways processing lightness (ON) and darkness (OFF). V1 neurons overall  
47 respond more strongly to dark than light stimuli, consistent with a preponderance of  
48 darker regions in natural images, as well as human psychophysics. However, it has been  
49 unclear whether this "dark-dominance" is due to more excitation from the OFF pathway  
50 or more inhibition from the ON pathway. To understand the mechanisms behind dark-  
51 dominance, we record electrophysiological responses of individual simple-type V1  
52 neurons to natural image stimuli and then train biologically inspired convolutional neural  
53 networks to predict the neurons' responses. Analyzing a sample of 74 neurons (in  
54 anesthetized, paralyzed cats) has revealed their responses to be more driven by dark than  
55 light stimuli, consistent with previous investigations. We show that this asymmetry is  
56 predominantly due to slower inhibition to dark stimuli rather than to stronger excitation  
57 from the thalamocortical OFF pathway. Consistent with dark-dominant neurons having  
58 faster responses than light-dominant neurons, we find dark-dominance to solely occur in  
59 the early latencies of neurons' responses. Neurons that are strongly dark-dominated also  
60 tend to be less orientation selective. This novel approach gives us new insight into the  
61 dark-dominance phenomenon and provides an avenue to address new questions about  
62 excitatory and inhibitory integration in cortical neurons.

63

64

65

66 **Significance**

67

68 Neurons in the early visual cortex respond on average more strongly to dark than to light  
69 stimuli, but the mechanisms behind this bias have been unclear. Here we address this  
70 issue by combining single-unit electrophysiology with a novel machine learning model to  
71 analyze neurons' responses to natural image stimuli in primary visual cortex. Using these  
72 techniques, we find slower inhibition to light than to dark stimuli to be the leading  
73 mechanism behind stronger dark responses. This slower inhibition to light might help  
74 explain other empirical findings, such as why orientation selectivity is weaker at earlier  
75 response latencies. These results demonstrate how imbalances in excitation vs. inhibition  
76 can give rise to response asymmetries in cortical neuron responses.

77

## 78 **Introduction**

79           The early thalamocortical visual system is separated into two distinct pathways:  
80 an ON pathway which responds more to lighter parts of images and an OFF pathway  
81 which encodes darker image regions. Neurons in primary visual cortex (V1) combine  
82 inputs from these two pathways, but the nature of this integration is still poorly  
83 understood.

84           V1 neurons evidently receive asymmetrical inputs from the two pathways, since  
85 they are on average more responsive to dark than light stimuli (Jin et al., 2008; Yeh et al.,  
86 2009), especially at low spatial frequencies (Kremkow et al., 2014; Jansen et al., 2019)  
87 and shorter time latencies (Komban et al., 2014). This asymmetry is presumably adaptive  
88 due to the preponderance of dark regions in natural images (Ratliff et al., 2010), which is  
89 also more pronounced at lower spatial frequencies (Cooper & Norcia, 2015). These  
90 asymmetries may influence human perception, since dark stimuli are processed faster and  
91 more reliably than light stimuli (Buchner & Baumgartner, 2007; Komban, Alonso &  
92 Zaidi, 2011).

93           There are more OFF than ON excitatory inputs from the lateral geniculate  
94 nucleus (LGN) to layer 4 of V1, which could help explain why responses to dark stimuli  
95 are stronger in V1 (Jin et al., 2008). However, this does not explain why more dark-  
96 dominant neurons are found in layers 2/3 than in layer 4 (Yeh et al., 2009). This  
97 discrepancy could be explained by stronger ON than OFF intracortical inhibition within  
98 V1 (Taylor, Sedigh-Sarvestani, Vigeland, Palmer, & Contreras, 2018). Hence, whether  
99 dark-dominance is mostly due to excitation to dark stimuli or inhibition to light stimuli  
100 remains unclear. Here we develop a novel machine learning approach to disambiguate

101 excitation from inhibition in extracellular recordings, which allows us to make  
102 quantitative inferences about how cortical neurons integrate ON and OFF inputs.

103 To better understand how visual stimuli drive V1 responses, we predict the  
104 responses of recorded neurons to natural images with a simple, biologically-inspired  
105 convolutional neural network. This neural network processes the natural images' light  
106 (ON) and dark (OFF) information in two distinct pathways. The first layer of each  
107 pathway consists of a convolution with a parametrized 2D gaussian spatial filter, which  
108 represents the responses of LGN neurons (omitting the weaker surrounds; Croner &  
109 Kaplan, 1995). The second layer is a linear weighted sum of the excitatory or inhibitory  
110 contributions of each pathway, which then sum to provide the model's output. From these  
111 estimated weights, we infer how much excitation and inhibition arises from each  
112 pathway, at every spatial location and temporal lag of a V1 cell's receptive field.

113 Using this approach, we find the dark-dominance phenomenon in V1 neurons to  
114 only occur at the early response latencies. We show these stronger dark responses to be  
115 predominantly driven by a lack of inhibition to dark stimuli at early latencies. We also  
116 find that this slower inhibition to dark stimuli is associated with less orientation  
117 selectivity in neurons' early responses (Ringach, Hawkin, & Shapley, 1997; Shapley,  
118 Hawken & Ringach, 2003). These findings suggest that slower inhibition to dark than to  
119 light stimuli plays a crucial role in the dark-dominance found in primary visual cortex.

120

121

122

123

124

## 125 **Methods**

126

### 127 *Animal preparation*

128 Anesthesia in adult cats was induced by isoflurane-oxygen (3–5%) inhalation,  
129 followed by intravenous cannulation and bolus injection of propofol (5 mg/kg). Surgical  
130 anesthesia was maintained with supplemental doses of propofol. Glycopyrrolate (30 µg)  
131 and dexamethasone (1.8 mg) were administered and a tracheal cannula or intubation tube  
132 was inserted. Throughout the surgery, body temperature was thermostatically maintained  
133 and heart rate was monitored (Vet/Ox Plus 4700).

134 The animal was then positioned in a stereotaxic apparatus and connected to a  
135 ventilator (Ugo Basile 6025). Cortical Area 17 was exposed by a craniotomy (P3/L1) and  
136 a small durotomy, and the cortical surface protected with 2% agarose capped with  
137 petroleum jelly. Local injections of bupivacaine (0.50%) were administered at all surgical  
138 sites. During recording, anesthesia was maintained by infusion of propofol ( $5.3 \text{ mg} \cdot \text{kg}^{-1}$   
139  $\cdot \text{h}^{-1}$ ), and in addition, remifentanyl (initial bolus injection,  $1.25 \text{ µg} \cdot \text{kg}^{-1}$ , then infusion,  $3.7$   
140  $\text{µg} \cdot \text{kg}^{-1} \cdot \text{h}^{-1}$ ) and O<sub>2</sub>/N<sub>2</sub>O (30:70 ratio) delivered through the ventilator. Paralysis was  
141 produced with a bolus iv injection of gallamine triethiodide (to effect), followed by  
142 infusion ( $10 \text{ mg} \cdot \text{kg}^{-1} \cdot \text{h}^{-1}$ ). Throughout subsequent recording, expired CO<sub>2</sub>, EEG, ECG,  
143 body temperature, blood oxygen, heart rate, and airway pressure were monitored and  
144 maintained at appropriate levels. Intramuscular glycopyrrolate (16 µg) and  
145 dexamethasone (1.8 mg) were also administered daily.

146 Corneas were initially protected with topical carboxymethylcellulose (1%) and  
147 subsequently with neutral contact lenses. Spectacle lenses were selected with slit  
148 retinoscopy to produce emmetropia at 57 cm, and artificial pupils (2.5 mm) were

149 provided. Topical phenylephrine hydrochloride (2.5%) and atropine sulfate (1%), or  
150 cyclopentolate (1.0 %) in later experiments, were administered daily.

151 All animal procedures were approved by the McGill University Animal Care  
152 Committee and are in accordance with the guidelines of the Canadian Council on Animal  
153 Care.

154

#### 155 *Extracellular recording*

156 Recordings were performed using 32-channel silicon probes (NeuroNexus), in  
157 most cases polytrodes (A1x32-Poly2-5mm-50s-177) or occasionally linear arrays  
158 (A1x32-6mm-100-177), advanced with a stepping motor microdrive (M. Walsh  
159 Electronics, uD-800A). Raw electrophysiological signals were acquired with a Plexon  
160 Recorder (3 Hz to 8 kHz; sampling rate, 40 kHz), along with supplementary signals from  
161 a small photocell placed over one corner of the visual stimulus CRT, which were used for  
162 temporal registration of stimuli and spikes, and to verify the absence of dropped frames.  
163 Spike waveforms were carefully classified from the recorded multichannel data into  
164 single units, using Spikesorter (Swindale & Spacek, 2014). Only clearly sorted units were  
165 used for further analysis.

166 In total, 110 single units from 37 penetrations in 8 cats (4 males, 4 females) were  
167 analyzed. These recording experiments involved lab personnel working on other projects.  
168 Out of these neurons, 6 were rejected because part of their receptive fields was outside  
169 the screen, and 30 were rejected because the predictive performance of the fitted model  
170 was too low (see the Model Architecture section, below). The sample size included the  
171 remaining 74 neurons.

172

173

174 *Visual stimuli*

175         Visual stimuli were presented on a gamma-corrected CRT monitor (NEC FP1350,  
176 20 inches, 640x480 pixels, 150 Hz, 36 cd/m<sup>2</sup>) at a viewing distance of 57 cm. Stimuli  
177 were produced by an Apple Macintosh computer (MacPro, 2.66 GHz, 6 GB, MacOSX  
178 ver. 10.6.8, NVIDIA GeForce GT 120) using custom software written in MATLAB (ver.  
179 2012b) with the Psychophysics Toolbox (ver. 3.0.10; Pelli, 1997; Brainard, 1997; Kleiner  
180 et al., 2007). We selected a channel having with good spike responses to hand-held bar  
181 stimuli, which we used to determine the dominant eye (with the non-dominant eye  
182 subsequently occluded), and to position the CRT monitor to be approximately centered  
183 around the population receptive field.

184         Visual stimuli were ensembles of 375 natural images taken from the McGill  
185 Calibrated Colour Image Database (Olmos & Kingdom, 2004), cropped to 480x480,  
186 converted to monochrome 8-bit integers - as in Talebi & Baker (2012), but with a higher  
187 RMS contrast. We randomly presented each ensemble at 75 images per second (i.e. every  
188 13.33 ms) in short movies of 5 seconds each. We separated the ensembles into three sets,  
189 to evaluate predictive performance independently from overfitting. The training set had  
190 20 movies which were presented 5 times each, while the validation and testing sets each  
191 had 5 movies which were presented 20 times each. The validation and testing sets were  
192 presented more often to provide less noisy estimates of the fitted model's predictive  
193 performance. Instances of these three subsets of movies were quasi-randomly interleaved  
194 throughout the 45-minute recording session.

195         For the subsequent data analysis (described below), all images were resized from  
196 480x480 to 40x40 before training (see below) to avoid overparameterization of the fitted



197 model. Resizing was done using the Image module from the Python Image Library (PIL;  
198 Umesh, 2012).

199

200

### 201 *Model architecture*

202 To better understand differences between the ON and OFF pathways, we employ  
203 a model architecture abstracted from known visual circuitry (Figure 1), whose parameters  
204 are optimized to predict a recorded cortical neuron's mean spiking responses to the  
205 natural image ensembles. We model LGN receptive fields as parametrized 2D isotropic  
206 gaussians, acting convolutionally on the stimulus images. The antagonistic surrounds are  
207 neglected, so there is only a pair of gaussian width parameters, for the ON and OFF  
208 pathways, to be estimated. The connections between the gaussian operators and the  
209 model cortical neuron are a pair of linear weighted sums of rectified responses of the  
210 gaussian-operators, across a series of time lags. Each of these linear weighted sums acts  
211 like a "dense layer" in machine learning - but note that there is *not* a subsequent  
212 rectification. The output of each dense layer might be thought of as a presynaptic  
213 membrane potential contribution, from its respective ON or OFF pathway.

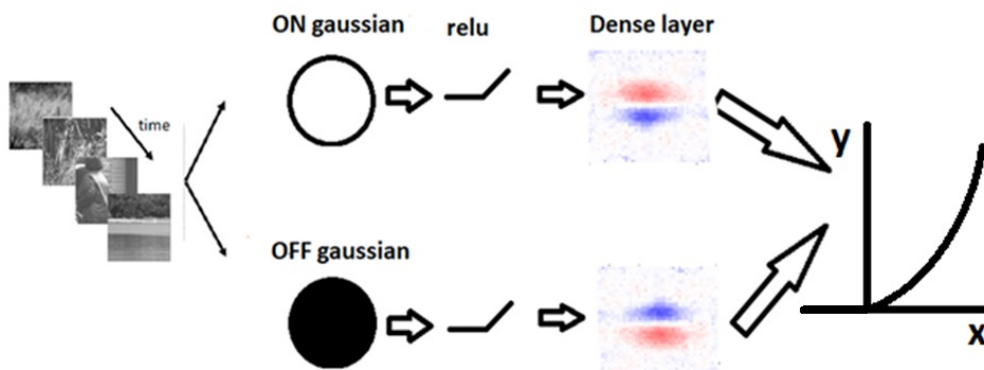

214

215

216 **Figure 1.** Model architecture for responses of a cortical neuron to visual stimuli such as natural  
217 images. Light and dark image regions are encoded as rectified responses of convolution with  
218 positive and negative spatial gaussians, respectively. Linear weighted sums are separately taken  
219 for each pathway and summed, followed by a half-power pointwise nonlinearity. A machine  
220 learning algorithm estimates the sizes of the parameterized gaussian operators, and the two sets of  
221 dense layer weights, for each of a series of time lags.

222

223

224 The inputs to the model are the pixel luminance values of the natural image  
225 stimuli (cropped, and spatially downsampled to 40x40 pixels, as described below). The  
226 mean of the inputs is centered at zero by subtracting the overall mean across all images  
227 within an ensemble. To model the neuron's temporal processing, the inputs to the  
228 estimated model (see below) are composed of the preceding 7 images, each of which  
229 were presented for 13.33 ms. The model output is the neuron's response, with spike times  
230 collected into time bins of 13.33 ms each (duration of each stimulus image frame).

231 The stimulus images are convolved with a pair of parametrized 2D gaussian filters  
232 (with positive or negative polarity for the ON and OFF pathways, respectively), each  
233 followed with a half-wave rectification (ReLU). The 2D gaussians represent receptive  
234 fields of LGN neurons in which the weaker surrounds (Croner & Kaplan, 1995) are  
235 neglected, as follows:

236 
$$g(h, v, p, t) = \frac{\alpha_p}{\sqrt{2\pi\sigma_p^2}} e^{-\left(\frac{h^2 + v^2}{\sigma_p^2}\right)} \quad (1)$$

237

238 where  $h$  and  $v$  are the horizontal and vertical distances between a pixel and the center of  
239 the gaussian, respectively, and  $\sigma$  represents the standard deviation (i.e. width) and  $\alpha$  the  
240 amplitude (i.e. the height) of the 2D gaussian. The  $\sigma$  parameter is estimated separately for  
241 each pathway ( $p$ ). To allow each pathway to selectively process light or dark information,  
242  $\alpha$  is set to 1 for the ON pathway and -1 for the OFF pathway. The convolution of the 2D  
243 gaussian with the inputs is half-wave rectified (ReLU), to mimic spike frequency  
244 responses of LGN neurons (Persi et al., 2011):

$$245$$
$$246 \quad c(i, j, t, p, k) = \max(0, \sum_{h=-5}^6 \sum_{v=-5}^6 x_{i+h, j+v, k, t} * g(h, v, p, t)) \quad (2)$$
$$247$$

248 where  $i$  and  $j$  are the horizontal and vertical coordinates of the center of the 12x12 2D  
249 gaussian,  $x$  is the luminance of a specific pixel (resized to a grid of 40x40),  $t$  is the  
250 number of time bins between the shown image and the recorded response (latency), and  $k$   
251 is the time bin of the neuron's response. The convolution with the 2D gaussians is  
252 implemented with zero-padding and a "stride" of 1. Due to the first rectification, the ON-  
253 pathway encodes luminance above (lighter than) the mean, and the OFF-pathway  
254 luminance below (darker than) the mean.

255 For each of the ON- or OFF-pathways, the model then takes a linear weighted  
256 sum of the convolution outputs from the respective rectified gaussians, with each weight  
257 notionally representing the excitatory or inhibitory inputs from an array of LGN cells to  
258 the cortical neuron. The sum of responses from these dense layers is followed by a  
259 rectified power law output nonlinearity, which forms the final output of the model and  
260 the prediction of the neuron's mean spiking response:

261

$$\hat{y}_{pre}(k) = \max(0, \sum_{p=1}^2 \sum_{t=1}^7 \sum_{i=1}^{40} \sum_{j=1}^{40} c(i, j, p, t, k) w_{i,j,p,t}) \quad (3)$$

263

$$\hat{y}(k) = a \hat{y}_{pre}^b(k) \quad (4)$$

265

266 where  $w$  represents the dense layer weights,  $\hat{y}(k)$  is the prediction of a neuron's response  
267 for the  $k^{\text{th}}$  time bin,  $b$  is the exponent of the rectified power nonlinearity, and  $a$  is a scale  
268 (gain) factor.

269 To estimate the proportion of the variance in a neuron's response that is  
270 accounted for by the model's predictions, we calculate a variance-accounted-for (VAF)  
271 index by taking the square of the Pearson correlation coefficient between  $y$  (neuron's  
272 response) and  $\hat{y}$  (model's predictions). To insure that the estimated weights are  
273 representative of each neuron's responses to visual stimuli, we excluded neurons with a  
274 VAF below 10% in the testing set (see below). Based on this criterion we excluded 30  
275 neurons, which resulted in a sample size of 74 neurons for the remaining analysis.

276

### 277 *Optimization and regularization*

278 To characterize a neuron's receptive field, we find the model parameters which  
279 minimize the difference between its recorded responses and the responses predicted by  
280 the model of Equation 3, which requires fitting a total of  $2 \times 40 \times 40 \times 7 = 22,400$  dense layer  
281 weights, and 2 parameters ( $\sigma_{ON}$  and  $\sigma_{OFF}$ ) for the 2D gaussians (fitting of the two  
282 parameters for the output nonlinearity, Equation 4, is described below). To minimize  
283 over-fitting due to the large number of parameters, we employ L2-regularization by  
284 penalizing the squared amplitude of the dense layer weights (Hoel & Kennard, 1970),

285 implemented by minimizing a loss function in which the first term is the squared error of  
286 the model prediction and the second term the regularization penalty:

287

$$288 \quad L = \sum_{k=1}^n (y_k - \hat{y}_k)^2 + \lambda \sum_{p=1}^2 \sum_{t=1}^7 \sum_{i=1}^{40} \sum_{j=1}^{40} w_{i,j,p,t} \quad (5)$$

289

290

291 where  $y_k$  is the neuron's recorded response,  $\hat{y}_k$  the model's predicted response for the  $k^{\text{th}}$   
292 time bin,  $w_{i,j,t,p}$  the dense layer weights (for the  $p$ -th On/Off stream,  $t$ -th time lag, and  $i,j$ -  
293 th dense layer position) and  $\lambda$  the L2-regularization hyperparameter. Based on pilot  
294 results from a representative subset of neurons, the hyperparameter  $\lambda$  is set to  $5 \times 10^{-6}$  in a  
295 first pass and  $2 \times 10^{-6}$  in a second pass (see below, three-pass training procedure). In the  
296 third pass, we train the model with different  $\lambda$  values of  $[1,2,4,8,16] \times 10^{-6}$ , and choose  
297 the  $\lambda$  value giving the best model performance on the validation dataset for each neuron.

298 This loss function is minimized using the Adam optimization algorithm (Kingma  
299 & Ba, 2014) with mini-batch gradient descent (Li et al., 2014). To further reduce  
300 overfitting, we apply dropout during training to both the convolutional and dense layers  
301 with a probability of 50% (Srivasta et al., 2014).

302 The data is separated into training, validation, and test sets, corresponding to the  
303 three sets of stimulus movies. The model parameters are fit to the training set using a  
304 mini-batch size of 100 stimulus-response pairs. As an additional regularization measure,  
305 training is stopped if there is no improvement on the validation set in the preceding 50  
306 epochs - then we use the model at its peak performance (i.e. 50 epochs before training

307 stops) in subsequent analyses. We use a third, separate test set to obtain an unbiased  
308 estimate of predictive performance.

309

### 310 *Three-pass training procedure*

311 Because V1 receptive fields usually only occupy a small subset of the displayed  
312 visual stimulus images, it would be detrimental to optimize each neuron's model based  
313 on the full extent of the images. Doing so would entail a very high overparameterization,  
314 or a loss of spatial resolution due to excessive downsampling of the stimulus images, in  
315 either case yielding poorer predictive performance. To address this issue, we use a three-  
316 pass training procedure, with each pass improving the spatial resolution of the receptive  
317 field estimate. In the first pass, we optimize the model parameters using the full 480x480  
318 stimulus images downsampled to 40x40. We then manually designate a square cropping  
319 window that encloses an area slightly larger than the apparent receptive field. Next, we  
320 crop the stimulus images within that window, and rescale each image within it to 40x40.  
321 Due to the resizing, this cropped image then has much better spatial resolution than the  
322 40x40 image from the first-pass. This image is used to re-train the model in the second  
323 pass, where we repeat the procedure, but with the cropped image. In the third pass, we  
324 further adjust the cropping window based on the model estimate obtained in the second  
325 pass. This third pass provides much higher accuracy in identifying the boundaries of the  
326 receptive field, and gives us the final model fits that we use for the remaining analysis.  
327 This three-pass training procedure allows us to characterize a neuron's receptive field  
328 with high resolution and substantially increases predictive performance.

329

330 *Output nonlinearity*

331           A cortical neuron's spike frequency response has often been modeled with a final  
332 output nonlinearity, consisting of a rectified power law (Heeger, 1991; Anzai et al, 1999;  
333 Persi et al., 2011). However, it has proven problematic to simultaneously estimate the  
334 power law exponent with the other parameters using the backpropagation algorithm  
335 employed here. This problem is most likely due in part to the "exploding gradient"  
336 problem (Pascanu, Mikolov & Bengio, 2012). To resolve this issue, we initially set a  
337 power-law exponent value of unity (1.0), and wait 100 epochs into the training algorithm,  
338 to get a rough estimate of the other parameter values. We then pause the model  
339 optimization, to fit the two parameters of the output nonlinearity to the predicted vs.  
340 measured neuron responses - and then resume full model parameter optimization, keeping  
341 the output nonlinearity parameters fixed.

342           To address the heavily uneven distribution of the measured firing rates, we bin the  
343 predicted responses into 100 bins of 75 responses each, and compute the mean measured  
344 response for each bin - a modification of the method used by Anzai et al (1999). We then  
345 fit a scaling factor ' $a$ ' and an exponent ' $b$ ' (Eq. 4) to minimize the difference between the  
346 binned predicted responses  $\hat{y}$  and the measured spike rates  $y$ , using python scipy's  
347 '*optimize.curve\_fit*'.

348

349

350 *Estimating excitation and inhibition*

351           The spatiotemporal properties of each of the ON and OFF pathways in the fitted  
352 model depend on both the dense layer weights and estimated 2D gaussians (which may

353 differ in width for the ON and OFF pathways). To incorporate both in our analysis, for  
 354 each of the ON and OFF pathways we convolve the 2D gaussian with the corresponding  
 355 dense weights, to produce a 40x40x7 spatio-temporal filter for each pathway ( $ON_{Recon}$   
 356 and  $OFF_{Recon}$ ). This "reconstructed" receptive field represents the neuron's  
 357 responsiveness to either light or dark stimuli. For further analyses we estimate the overall  
 358 amount of excitation and inhibition from the filter for each pathway and time lag, by  
 359 taking the sum of all positive or negative values in either the ON or OFF reconstructed  
 360 receptive field. This procedure provides an inference of the total amount of ON  
 361 excitation, ON inhibition, OFF excitation and OFF inhibition contributing to each  
 362 neuron's response:

$$363 \quad ON_{excit}(t) = \sum_{j=1}^{40} \sum_{i=1}^{40} \max(0, ON_{Recon}(i, j, t)) \quad (6)$$

$$364 \quad OFF_{excit}(t) = \sum_{j=1}^{40} \sum_{i=1}^{40} \max(0, OFF_{Recon}(i, j, t)) \quad (7)$$

$$365 \quad ON_{inhib}(t) = - \sum_{j=1}^{40} \sum_{i=1}^{40} \min(0, ON_{Recon}(i, j, t)) \quad (8)$$

$$366 \quad OFF_{inhib}(t) = - \sum_{j=1}^{40} \sum_{i=1}^{40} \min(0, OFF_{Recon}(i, j, t)) \quad (9)$$

367 where  $ON_{Recon}$  represents the contribution of the ON pathway to the estimated  
 368 relationship between (light) stimuli and the neuron's responses (and similarly for  
 369  $OFF_{Recon}$ ).  $ON_{Recon}$  and  $OFF_{Recon}$  are estimated from the convolution of the spatiotemporal  
 370 weights,  $w_{p,t}$ , with the gaussian layer,  $g_{p,t}$  for  $p=1$  (and similarly for  $OFF_{Recon}$  for  $p=2$ ):

$$371 \quad ON_{Recon}(t) = w_{p=1,t} * g_{p=1,t} \quad (10)$$

$$372 \quad OFF_{Recon}(t) = w_{p=2,t} * g_{p=2,t} \quad (11)$$



373           Parts of our analysis are based on each neuron’s peak latency of responsiveness,  
374   determined as the latency having the greatest variance in the sum of the reconstructions  
375   from each pathway:

$$376 \quad Var_{Recon}(t) = \frac{\sum_{j=1}^{40} \sum_{i=1}^{40} (Recon(i,j,t) - Mean_{Recon}(t))^2}{160} \quad (12)$$

377   where

$$378 \quad Recon(i, j, t) = ON_{Recon}(i, j, t) + OFF_{Recon}(i, j, t) \quad (13)$$

$$379 \quad Mean_{Recon}(t) = \frac{\sum_{j=1}^{40} \sum_{i=1}^{40} Recon(i, j, t)}{160} \quad (14)$$

380   The latency  $t$  with the highest  $Var_{Recon}$  will be referred to as  $T$ .

381

382

383   *Light/dark balance*

384           To quantify the extent to which individual neurons are light- or dark- dominated,  
385   we use a light-dark balance index (LDB) to indicate the relative influence of a neuron's  
386   light and dark weights:

$$387 \quad LDB(t) = (B_{Light}(t) - B_{Dark}(t)) / (B_{Light}(t) + B_{Dark}(t)) \quad (15)$$

388   where

$$389 \quad B_{Light}(t) = ON_{excit}(t) + OFF_{inhib}(t) \quad (16)$$

$$390 \quad B_{Dark}(t) = OFF_{excit}(t) + ON_{inhib}(t) \quad (17)$$

391           This index varies from -1.0 to 1.0, with positive LDB values indicating a neuron  
392   is light-dominated, and negative values that it is dark-dominated.

393

394

### 395 *Excitation/Inhibition balance*

396 The excitation/inhibition balance (EIB) index is similar to LDB, but contrasts  
397 excitation with inhibition instead of light with dark:

$$398 \quad EIB(t) = (B_{\text{excit}}(t) - B_{\text{inhib}}(t)) / (B_{\text{excit}}(t) + B_{\text{inhib}}(t)) \quad (17)$$

399 where

$$400 \quad B_{\text{excit}}(t) = ON_{\text{excit}}(t) + OFF_{\text{excit}}(t) \quad (18)$$

$$401 \quad B_{\text{inhib}}(t) = ON_{\text{inhib}}(t) + OFF_{\text{inhib}}(t) \quad (19)$$

402 This index varies from -1 to 1, with positive EIB values indicating a neuron's response  
403 reflects relatively stronger excitation, and negative EIB values stronger inhibition.

404

### 405 *Simulated responses to artificial stimuli*

406 To better understand how dark-dominance influences neurons' responses to visual  
407 stimuli, we simulated the estimated models' responses to four different stimulus  
408 conditions. The 40x40 stimuli were tailored to each neuron's spatial receptive field,  
409 which we estimated by using  $Recon(i,j,T)$  (Eq. 13) at each neuron's peak latency  $T$  (see  
410 above). The four stimulus conditions (Fig. 6) are the following: light falling on light-  
411 driven regions (LL), dark on dark-driven regions (DD), light on light-driven and half of  
412 dark-driven regions (LLHD) and dark on dark-driven and half of light-driven regions  
413 (DDHL):

$$414 \quad LL(i, j) = \begin{cases} 1, & Recon(i, j, T) > 0 \\ 0, & Recon(i, j, T) \leq 0 \end{cases}$$

$$415 \quad DD(i, j) = \begin{cases} -1, & Recon(i, j, T) < 0 \\ 0, & Recon(i, j, T) \geq 0 \end{cases}$$

$$416 \quad LLHD(i, j) = \begin{cases} 1, & Recon(i, j, T) > 0 \\ -b(0.5), & Recon(i, j, T) \leq 0 \end{cases}$$

$$417 \quad DDHL(i, j) = \begin{cases} -1, & Recon(i, j, T) < 0 \\ b(0.5), & Recon(i, j, T) \geq 0 \end{cases}$$

418 where  $i$  and  $j$  index the spatial location of the image pixels,  $T$  is each neuron's peak  
419 latency and  $b$  is a random value (either 0 or 1) drawn from an equiprobable Bernoulli  
420 distribution. The first two stimulus conditions (LL and DD) are designed to only recruit  
421 excitation, while the latter two conditions recruit a mixture of both excitation and half as  
422 much inhibition. We used the estimated model of each neuron to simulate its response to  
423 each of these four stimulus conditions at different latencies. (Note that this procedure is  
424 equivalent to simulating the neuron's impulse response to each stimulus.) The average  
425 simulated responses across the entire sample at each latency are shown in Figure 6.

426

#### 427 *Orientation selectivity*

428 To better understand the relationship between dark-dominance and orientation  
429 selectivity, we simulated the estimated models' responses to static sinewave gratings at  
430 each of 36 orientations (with increments of 5 degrees), 56 spatial frequencies (equally  
431 spaced from 0.0667 to 0.143 cycles per image) and 36 phases (increments of 5 degrees).  
432 These responses were used to compute the orientation selectivity of each neuron using a  
433 vector summation method (Wörgötter & Eysel, 1987; Swindale, 1998):

434 
$$OS = \frac{(a^2 + b^2)^{1/2}}{\sum_{i=0}^{N-1} R(x_i)} \quad (12)$$

435 with

436 
$$a = \sum_{i=0}^{N-1} R(x_i) \cos(2x_i) \quad (13)$$

437 
$$b = \sum_{i=0}^{N-1} R(x_i) \sin(2x_i) \quad (14)$$

438 where N is the number of sinewave gratings,  $x_i$  is the orientation angle, and  $R(x_i)$   
439 represents the simulated responses. The orientation selectivity index,  $OS$ , was computed  
440 separately for each latency in individual neurons.

441

442

#### 443 *Experimental design and statistical analyses*

444 Most statistical tests here are paired t-tests, to compare whether there is a  
445 significant difference between the means of two groups. We also use one-sample t-tests  
446 to assess whether means differ significantly from zero, and perform linear regression to  
447 test the correlation between two sets of values. We adjust for multiple comparisons with  
448 Bonferroni corrections, where the significance threshold  $\alpha$  of 0.05 is divided by the  
449 number of comparisons (e.g., Figure 3B has 6 comparisons:  $\alpha = 0.05 / 6 = 0.0083$ ).  
450 Because visual responses are much weaker for latencies longer than 40 ms (see Figure 2),  
451 statistical tests are only performed for the first three latencies in Figures 5 and 7, with the  
452 correction for multiple comparisons adjusted accordingly.

453

454

## 455 **Results**

456 As described in the Methods, a simple neural network model (Figure 1) was fit to  
457 responses from individual neurons, to estimate 2D gaussians and 3D spatiotemporal  
458 filters (dense layers) separately for ON and OFF inputs, as well as a power law output  
459 nonlinearity. Figure 2 shows these estimated model parameters for four example neurons,  
460 which all had peak responses at the 13-27 or 27-40 ms latency. As we observed more  
461 generally, the early ON and OFF Gaussian filters for a given neuron were about the same  
462 size, but opposite in polarity. And for each neuron, the spatiotemporal filters (dense  
463 layers) were largely similar, both spatially and temporally, but opposite in polarity.

464 Many of the neurons had Gabor-like receptive fields that are orientation selective  
465 (Hubel & Wiesel, 1962), like the one shown in Figure 2A (with OS = 0.55). At the 27-40  
466 ms latency, this neuron has balanced light and dark responses for both the ON (left) and  
467 OFF (right) pathways (LDB = 0.04). This balance does not occur at the 13-27 ms latency,  
468 where the neuron responds more strongly to dark stimuli (LDB = -0.2). This bias is due  
469 to the OFF pathway having stronger excitation (red) than inhibition (blue), with the ON  
470 pathway being balanced.

471 Another neuron (Figure 2B) is also orientation selective (OS = 0.64), balanced  
472 (LDB = 0.02) at the 27-40 ms latency, and exhibits a bias toward dark responses (LDB =  
473 -0.3) at the 13-27 ms latency. However, for this neuron the 27-40 ms latency is  
474 imbalanced due to both the ON and OFF pathways, with the ON pathway having weaker  
475 excitation and the OFF pathway having weaker inhibition.

476 The neuron shown in Figure 2C differs from the previous examples in that it has  
 477 low orientation selectivity (OS = 0.09) due to its isotropic receptive field, which has a  
 478 dark center and an opposite-polarity surround. At the 13-27 ms latency, this neuron is  
 479 dark-dominant (LDB = -0.34) due to its weaker surround, especially in the OFF pathway.  
 480 Contrary to the above two example neurons, at the 27-40 ms latency this neuron is not  
 481 balanced but light-dominant, due to stronger inhibition than excitation in the OFF  
 482 pathway.

483 Not all neurons are dark-dominant - for example, the neuron in Figure 2D is light-  
 484 dominant at the 13-27 ms latency (LDB = 0.29), due to its Gaussian-like receptive field  
 485 with a light-responsive center and a weak surround. Similar to previous results, this  
 486 neuron is balanced at the 27-40 ms latency (LDB = -0.02). However, as we shall see  
 487 below, there is a tendency for most neurons to, on average, have stronger responses to  
 488 dark stimuli at the 13-27 ms latency, and to have stronger responses to light stimuli or to  
 489 be balanced at the 27-40 ms latency.

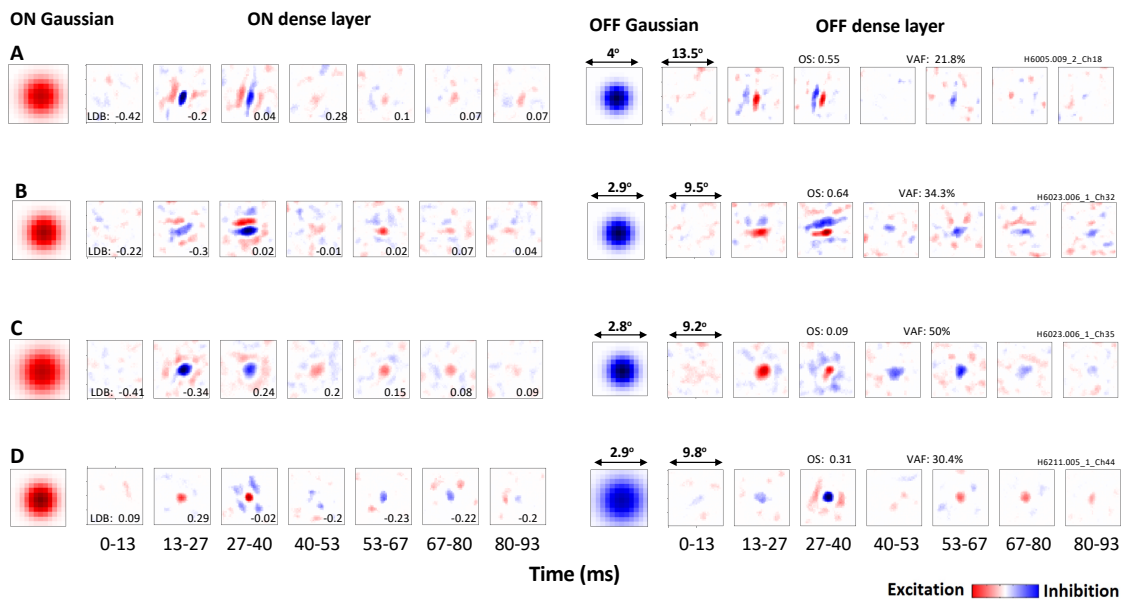

490

491

492 **Figure 2.** Gaussian filters and spatiotemporal dense layers estimated for four example neurons,  
493 one in each row. Elements of ON pathway on the left and OFF pathway on the right. Each dense  
494 layer is shown at a series of latencies ranging from 0-13 ms to 80-93 ms, with neurons being most  
495 responsive at the 13-27 ms and 27-40 ms latencies. Positive values (excitation) are in red and  
496 negative values (inhibition) are in blue. Orientation selectivity (OS) and variance accounted for  
497 (VAF) are indicated for each neuron, and light-dark balance (LDB) values for each latency. **A, B,**  
498 Both neurons respond more strongly to dark stimuli ( $LDB < 0$ ) at the 13-27 ms latency, and  
499 become more balanced ( $LDB \sim \text{zero}$ ) at the 27-40 ms latency. **C,** Neuron is also dark-dominant at  
500 the 13-27 ms latency but responds more strongly to light at the 27-40 ms latency. **D,** Neuron that  
501 is instead light-dominant at the 13-27 ms latency, and balanced at the 27-40 ms latency.

502

### 503 *Population responses*

504 To investigate the patterns of light and dark response strength across the sample  
505 of 74 neurons, we computed the sums of the four types of inputs for each neuron's  
506 optimal time lag (see Methods). Neurons had an optimal time latency of either 0-13.3 (38  
507 neurons), 13.3-26.7 ms (35 neurons) or 26.7-40 ms (1 neuron). As described in the  
508 Methods, we estimated the overall amount of excitation and inhibition from the ON and  
509 OFF pathways, and also used these values to calculate an index of light-vs-dark balance,  
510 LDB. We classified each neuron as dark-dominated ( $LDB < 0$ ) or light-dominated ( $LDB$   
511  $> 0$ ) depending on whether it was more responsive to dark (OFF excitation and ON  
512 inhibition) or light (ON excitation and OFF inhibition) at its optimal time latency. Across  
513 our population of 74 neurons, we found 46 neurons (62.16%) to be dark-dominated  
514 ( $LDB < 0$ ) and 28 neurons (37.84%) to be light-dominated ( $LDB > 0$ ) at their optimal

515 latencies, similar to Yeh et al. (2009). The neurons in our sample had a wide range of  
516 LDB values (Figure 3A; minimum = -0.62, maximum = 0.57, median = -0.078), but were  
517 on average dark-dominated, with an average LDB of -0.094 (Figure 3A;  $t = -3.49$ ,  $df =$   
518  $73$ ,  $p = 0.00081$ ).

519 To better understand why cortical neurons are on average more responsive to dark  
520 than light stimuli, we next compare the four types of inputs (Figure 3B) at each neuron's  
521 optimal latency. ON pathway inhibition is the strongest type of input on average, and is  
522 significantly stronger than the other three. ON inhibition is on average significantly  
523 stronger than ON excitation (paired t-tests with Bonferroni correction;  $t = 4.21$ ,  $df = 73$ ,  $p$   
524  $= 7.07 \times 10^{-5}$ ), OFF excitation ( $t = 3.03$ ,  $df = 73$ ,  $p = 0.0034$ ) and OFF inhibition ( $t =$   
525  $3.95$ ,  $df = 73$ ,  $p = 0.00018$ ). In contrast, OFF inhibition is on average the weakest type of  
526 input. While it has previously been suggested that stronger OFF than ON excitation could  
527 underlie stronger dark responses (Jin et al., 2008), the overall dark-dominance effect we  
528 observe at the optimal latency instead seems to be due to a strong imbalance between ON  
529 and OFF inhibition: while inhibition is on average 37.95% stronger from the ON than  
530 from the OFF pathway (Figure 3C), there is no significant difference between excitation  
531 from the ON and OFF pathways (Figure 3D;  $t = 0.81$ ,  $df = 73$ ,  $p = 0.42$ ). The difference  
532 between ON and OFF inhibition (Figure 3C) is also significantly stronger ( $t = 2.96$ ,  $df =$   
533  $73$ ,  $p = 0.0042$ ) than the difference between ON and OFF excitation (Figure 3D).

534 In addition, whether a given neuron is light- or dark-dominated is strongly related  
535 to whether ON inhibition exceeds OFF inhibition (Figure 3C, red points above 1:1 line  
536 vs. blue points below). However, the imbalance of ON vs. OFF excitation poorly predicts  
537 whether a neuron is light or dark-dominant (Figure 3D). Overall, these results suggest the



538 dark-dominance effect to be more driven by an imbalance in ON/OFF inhibition than by  
 539 an imbalance in ON/OFF excitation.

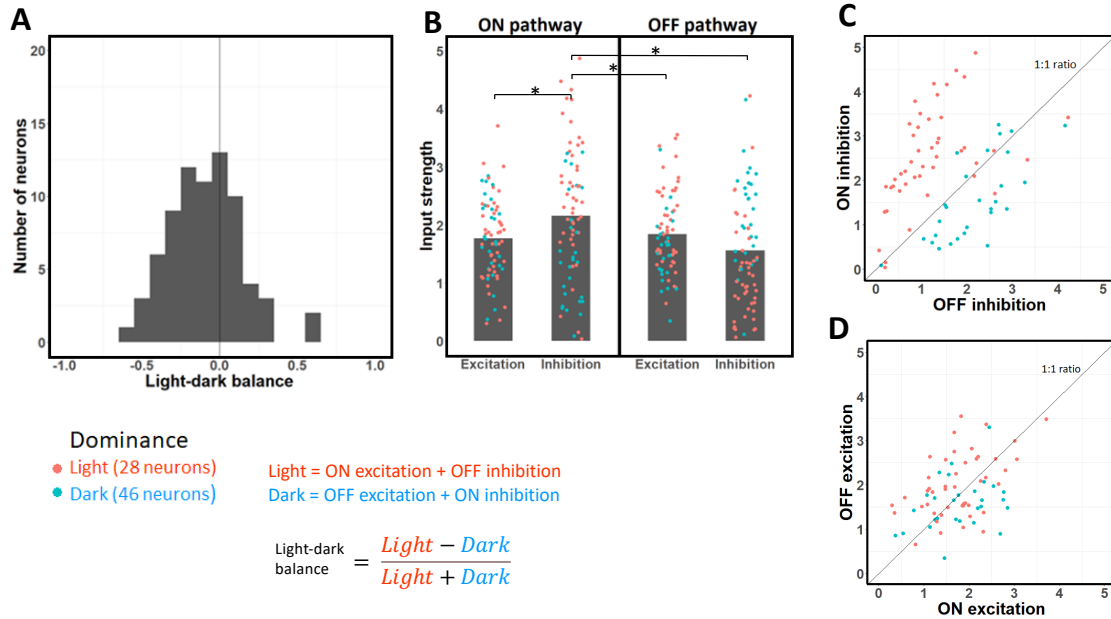

540

541 **Figure 3.** Strengths of excitation and inhibition from the ON and OFF pathways at each

542 neuron's optimal time lag. **A**, Distribution of light-dark balance (LDB) index values for each

543 neuron at its optimal latency. This index is on average negative, which indicates neurons respond

544 more strongly to dark than light stimuli. **B**, Strength of excitation and inhibition across the ON

545 and OFF pathways for each neuron, with average values shown as gray bars. Note ON inhibition

546 is the strongest input on average. Blue dots represent light-dominant neurons and orange dots

547 represent dark-dominant neurons. Significant paired t-tests (with Bonferroni correction,  $p <$

548  $0.0083$ ) are indicated by a star (\*). **C**, Scatterplot of ON vs. OFF inhibition, for each of the 74

549 neurons. Most neurons have stronger ON inhibition, and whether ON or OFF inhibition is

550 stronger is correlated with light and dark-dominance. **D**, same as (C) but for ON and OFF

551 excitation. Unlike the result for inhibition in (C), note that ON and OFF excitation have relatively

552 similar strength on average.

553

554

555 *Time dynamics*

556 Since responses to dark stimuli have previously been found to have shorter  
557 latencies than responses to light stimuli (Komban et al., 2014), we suspected the above  
558 results might vary as a function of response latency. The dependence of light-dark  
559 balance is shown for each of the measured time lags in Figure 4A, with data points for  
560 each sampled neuron, and gray bars indicating their averages. The dark-dominance effect  
561 is especially predominant at the 0-13.3 ms (one sample t-tests with Bonferroni correction;  
562  $t = -7.68$ ,  $df = 73$ ,  $p = 5.6 \times 10^{-11}$ ) and 13.3-26.7 ms latencies ( $t = -3.90$ ,  $df = 73$ ,  $p$ -value  
563  $= 0.00021$ ). The dark-dominance effect disappears at the 26.7-40 ms latency, with  
564 slightly stronger average responses to light than dark, though the difference is not  
565 significant ( $t = 2.48$ ,  $df = 73$ ,  $p = 0.015$ ). At the longer latencies, there is no significant  
566 average light- or dark-dominance ( $p > 0.15$ ). These findings suggest that while V1  
567 neurons are on average biased towards dark responses in their short latencies, the dark-  
568 dominance effect disappears at the 27-40 ms latency.

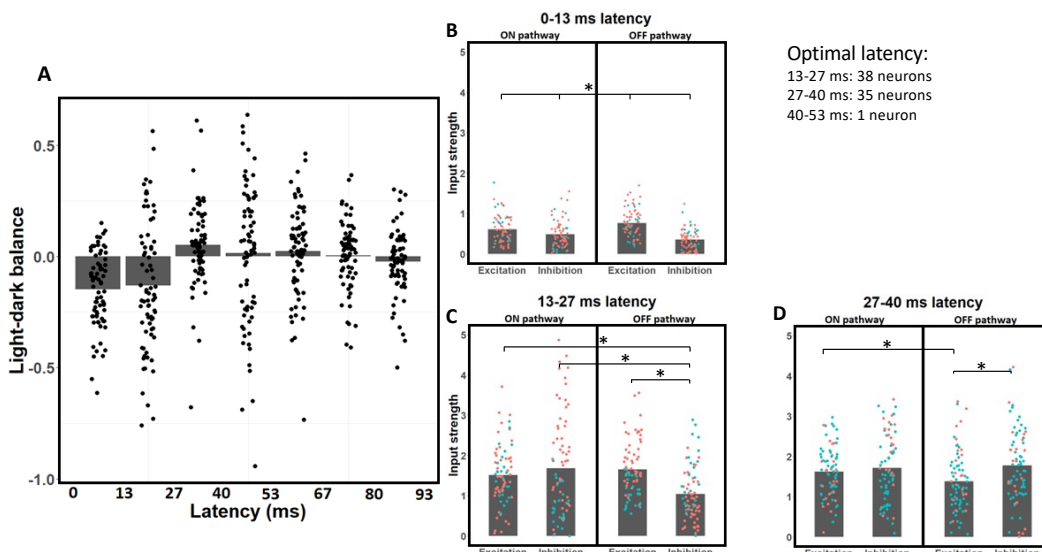

569

570 **Figure 4.** Light-dark balance index and strength of excitation/inhibition of ON and OFF  
571 pathways for all neurons, across different latencies. **A**, Light-dark balance index values, shown as  
572 bar graph of average values for each latency, with superimposed data points for individual  
573 neurons. The 0-13.3 and 13.3-26.7 ms latencies exhibit dark-dominance, the 26.7-40 ms latency  
574 shows a slight bias towards light-dominance and the later latencies are relatively balanced. **B**,  
575 Excitation and inhibition from the ON and OFF pathways for each neuron at the 0-13.3 ms  
576 latency. OFF excitation is stronger than ON excitation on average, and inhibition is significantly  
577 weaker than excitation at this latency. **C**, Same as (**B**) but for the 13.3-26.7 ms latency - note the  
578 relatively balanced values on average, except for OFF inhibition which is significantly weaker  
579 than the other three types of input. **D**, Same as (**B,C**) but for the 26.7-40 ms latency - note the  
580 significantly weaker OFF excitation on average compared to the other three types of input.  
581 Significant paired t-tests (with Bonferroni correction,  $p < 0.0083$ ) are shown by a star (\*) for **B**, **C**  
582 and **D**. All of the pair-wise comparisons are significantly different in **D**.

583

584 To understand why neurons are dark-dominated in their early latencies, we  
585 investigate how the strength of each input type varies as a function of time. Because  
586 neurons are most responsive up until a latency of 40 ms, the following sections focus on  
587 the first three latencies. As we can see in Figure 4B, at a latency of 0-13.3 ms OFF  
588 excitation is the strongest input on average - it is 25.5% stronger than ON excitation  
589 (paired t-tests with Bonferroni correction;  $t = 5.47$ ,  $df = 73$ ,  $p = 6.0 \times 10^{-7}$ ). Inhibition is  
590 significantly weaker than excitation, both in the ON ( $t = 4.35$ ,  $df = 73$ ,  $p = 4.36 \times 10^{-5}$ )  
591 and OFF ( $t = 13.1$ ,  $df = 73$ ,  $p < 2.2 \times 10^{-16}$ ) pathways. This discrepancy is stronger in the  
592 OFF than in the ON pathway ( $t = 7.51$ ,  $df = 73$ ,  $p = 1.17 \times 10^{-10}$ ). Inhibition is on average  
593 37.9% stronger from the ON than from the OFF pathway ( $t = 5.35$ ,  $df = 73$ ,  $p = 9.76 \times 10^{-7}$ ),  
594 thereby contributing to stronger dark responses. Weaker inhibition than excitation at

595 the shortest latency could be explained by inhibition having to go through at least one  
596 more synapse than excitation to reach V1 neurons (Ferster & Lindström 1983, Martin &  
597 Whitteridge 1984; Montero, 1986). These results are also consistent with findings from  
598 Jin et al. (2008), who demonstrated stronger OFF than ON excitation from the LGN to be  
599 an important mechanism contributing to the dark-dominance phenomenon. However,  
600 while stronger OFF than ON excitation might explain dark-dominance at the 0-13.3 ms  
601 latency, the overall dark/light dominance of neurons will be more related to the  
602 considerably stronger responses at the 13.3-26.7 and 26.7-40 ms latencies.

603 Responses at the 13.3-26.7 ms latency are also stronger to dark stimuli (Figure  
604 4C), but for a different reason. OFF excitation is not significantly stronger than ON  
605 excitation at the 13.3-26.7 ms latency (paired t-tests with Bonferroni correction;  $t = 1.65$ ,  
606  $df = 73$ ,  $p = 0.103$ ). Instead, dark-dominance at this latency is due to weaker OFF  
607 inhibition compared to the other three types of inputs. Inhibition from the OFF pathway  
608 is on average 38.3% weaker than inhibition from the ON pathway ( $t = 4.58$ ,  $df = 73$ ,  $p =$   
609  $1.88 \times 10^{-5}$ ). OFF inhibition is also on average 31.2% weaker than ON excitation ( $t =$   
610  $7.67$ ,  $df = 73$ ,  $p = 5.77 \times 10^{-11}$ ) and on average 36.9% weaker than OFF excitation ( $t =$   
611  $5.84$ ,  $df = 73$ ,  $p = 1.37 \times 10^{-7}$ ). No other pair of inputs are significantly different from  
612 each other ( $p < 0.0083$ ) at the 13.3-26.7 ms latency, further strengthening the idea that the  
613 imbalance between light and dark responses at this latency is due to weaker OFF  
614 inhibition.

615 Contrary to the results for the earlier latencies, the 26.7-40 ms latency does not  
616 show dark-dominance (Figure 4D). The only significant differences are OFF excitation  
617 being both 22.4% weaker than OFF inhibition (paired t-tests with Bonferroni correction;  $t$

618 = 5.37,  $df = 73$ ,  $p = 9.1 \times 10^{-7}$ ) and 19.7% weaker than ON inhibition ( $t = 3.80$ ,  $df = 73$ ,  $p$   
619 = 0.0003). No other pair of inputs differ significantly ( $p < 0.0083$ ) at this latency. Thus,  
620 different types of input are relatively more balanced at this latency compared to the  
621 previous ones.

622 To further understand the time dynamics of dark and light responses, we next  
623 analyze how the strength of each type of input changes across latencies (Figure 5).  
624 Because all input types are much weaker at the 0-13.3 ms latency compared to the 13.3-  
625 26.7 and 26.7-40 ms latencies (Figure 5), we focus our analysis on comparing the two  
626 latencies with the strongest responses, 13.3-26.7 ms and 26.7-40 ms. Consistent with the  
627 above results, OFF inhibition is 41.4% weaker at 13.3-26.7 ms than at 26.7-40 ms (Figure  
628 5A; paired t-tests with Bonferroni correction;  $t = 8.14$ ,  $df = 73$ ,  $p = 7.63 \times 10^{-12}$ ), and is  
629 the only input type to differ significantly in strength between these two latencies. OFF  
630 excitation is 16.6% weaker at 26.7-40 ms than at 13.3-26.7 ms, but this difference is not  
631 significant (Figure 5B;  $t = 2.11$ ,  $df = 73$ ,  $p = 0.0381$ ). There are no significant differences  
632 between the 13.3-26.7 ms and 26.7-40 ms latencies for both ON inhibition (Figure 5C;  $t$   
633 = 0.197,  $df = 73$ ,  $p = 0.845$ ) and ON excitation (Figure 5D;  $t = 1.15$ ,  $df = 73$ ,  $p = 0.256$ ).  
634 These findings suggest that inhibition is slower to dark than light stimuli, which leads to  
635 dark-dominance at the 13.3-26.7 ms latency.

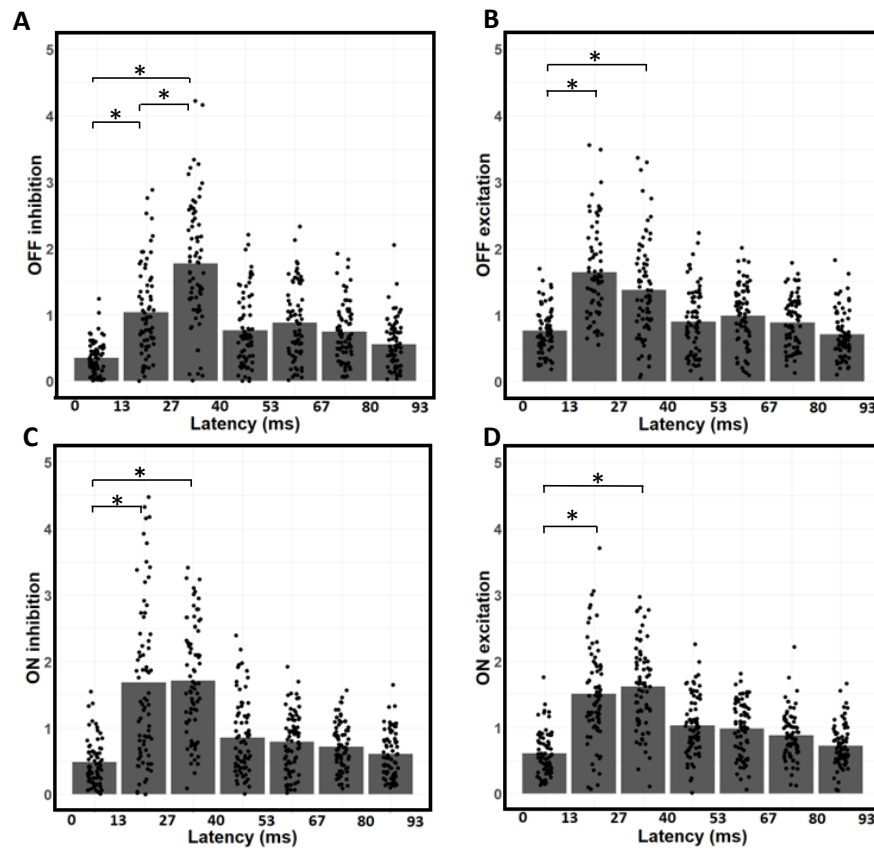

636

637

638 **Figure 5.** Temporal dependence of contributions from ON / OFF excitation and inhibition. *A*,  
639 Bar graph of average OFF inhibition strength across time lags, with data points indicating values  
640 for individual neurons. Note OFF inhibition is weaker at the 13.3-26.7 ms latency than at the  
641 26.7-40 ms latency. *B*, Same as (*A*) but for OFF excitation. *C*, Same as (*A-B*) but for ON  
642 inhibition. *D*, Same as (*A-C*) but for OFF excitation. Significant paired t-tests ( $p < 0.0167$ )  
643 between the first three latencies are shown by a star (\*). Note that OFF inhibition (*A*) is the only  
644 input type to significantly vary in strength between the 13.3-26.7 and 26.7-40 ms latencies. Also  
645 note that input strength at the 0-13.3 ms latency is always significantly weaker than at the 13.3-  
646 26.7 and 26.7-40 ms latencies.

647

648           The results so far suggest dark-dominance occurs at the 13-27 ms latency due to  
649 more inhibition to light than dark stimuli. Because of those results, we hypothesized the  
650 dark-dominance effect would depend on how much inhibition a neuron receives, which in  
651 turn depends on the relationship between the stimuli and a neuron's receptive field. There  
652 should be little or no dark-dominance from excitation alone, for example if we compare  
653 the responses to light stimuli falling upon the ON-excitation region to dark stimuli on the  
654 OFF-excitation region. Dark-dominance also cannot occur from inhibition alone, since  
655 the spontaneous firing rate is close to zero. Instead, dark-dominance should occur when a  
656 stimulus triggers both excitation and inhibition, for example when either light or dark  
657 stimuli fall upon both the light and dark-driven regions of a neuron's receptive field.

658           To test this hypothesis, we simulated responses of the estimated models to four  
659 different stimulus conditions tailored to the receptive field of each neuron (see Methods):  
660 1. Light stimuli on light-driven regions, 2. Dark stimuli on dark-driven regions, 3. Light  
661 stimuli on light and (half of) dark-driven regions, and 4. Dark stimuli on dark and (half  
662 of) light-driven regions (Figure 6, top parts). The averages of the four responses were  
663 taken across the entire sample of 74 neurons (Figure 6, lower plots). As expected, the  
664 simulation shows little or no dark-dominance when only the excitatory region is  
665 stimulated (conditions 1 and 2, Figure 6A). But as we hypothesized, we do obtain dark-  
666 dominance at the 13-27 ms latency with stimuli that both excite and inhibit the neuron's  
667 response (conditions 3 and 4, Figure 6B). These results support the idea that dark-  
668 dominance occurs when measured with stimuli that recruit both the excitatory and  
669 inhibitory regions of a neuron's receptive field.

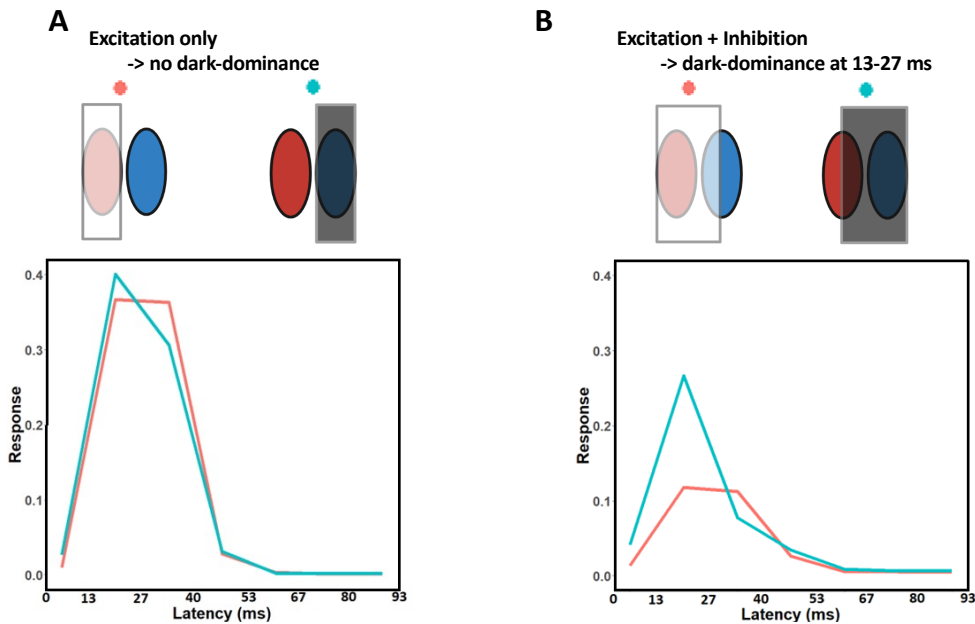

670

671 **Figure 6.** Average simulated temporal impulse responses to different stimuli. The stimuli were  
672 tailored to each neuron's receptive field and are presented here in a schematic form. **A**, Red  
673 shows the simulated responses to light stimuli on the light-driven regions of each neuron's  
674 receptive field. Blue shows the simulated response to dark stimuli on the dark-driven regions of  
675 each receptive field. The two responses are similar, suggesting responses to light and dark stimuli  
676 are relatively balanced across latencies. **B**, Red shows the simulated responses to light stimuli  
677 falling upon the light-driven regions, and also upon half of the dark-driven regions. Blue shows  
678 the simulated responses to dark stimuli on the dark-driven regions, plus on half of the light-driven  
679 regions. As expected, the responses are weaker than in (**A**), and this decrease is much less  
680 pronounced for the dark stimulus (blue line) at the 13-27 ms latency. These results suggest that  
681 dark-dominance predominantly occurs when measured with stimuli that recruit both the  
682 excitatory and inhibitory regions of a neuron's receptive field.

683

684

685



686 *Orientation selectivity*

687           Previous studies demonstrated that V1 neurons are less orientation selective in  
688 their early responses (Ringach et al, 1997; Shapley et al, 2003). Since we have found  
689 early latencies to respond more strongly to dark stimuli, we wondered whether the  
690 stronger dark-dominance might be related to weaker orientation selectivity. To infer  
691 orientation selectivity, we next simulate the responses of the neurons' fitted models to  
692 static sinewave grating stimuli with a series of orientations, spatial frequencies, and  
693 phases. For each latency, we select the sinewave grating with the best phase and spatial  
694 frequency for each orientation. We then use each model's simulated responses to these  
695 sinewave gratings to measure an index of orientation selectivity, *OS*, using a conventional  
696 vector summation method (Wörgötter & Eysel, 1987; Swindale, 1998; see Methods), as a  
697 function of latency. This orientation selectivity index for a given neuron typically peaks  
698 at the 26.7-40 ms latency (Figure 7A). More specifically, across the population the  
699 orientation selectivity is significantly higher at 26.7-40 ms than at both 13.3-26.7 ms  
700 (paired t-test with Bonferroni correction;  $t = 6.07$ ,  $df = 73$ ,  $p = 5.1 \times 10^{-8}$ ) and 0-13.3 ms  
701 ( $t = 5.95$ ,  $df = 73$ ,  $p = 8.4 \times 10^{-8}$ ). Orientation selectivity is slightly higher at the 13.3-26.7  
702 than at the 0-13.3 ms latency, but this difference is not significant ( $t = 2.17$ ,  $df = 73$ ,  $p =$   
703  $0.033$ ). These results suggest that orientation selectivity is most prominent at the 26.7-40  
704 ms latency, where is also the first latency where light and dark responses are relatively  
705 balanced.

706           We next investigate the relationship between orientation selectivity and light-dark  
707 balance at each neuron's optimal latency, which can be seen in Figure 7B. Neurons  
708 having high dark dominance ( $LDB \ll 0$ ) or high light dominance ( $LDB \gg 0$ ) tend to

709 have low orientation selectivity, while those that are more orientation selective are more  
710 often light-dark balanced (LDB  $\sim 0$ ). This apparent relationship is confirmed statistically:  
711 there is a significant negative relationship ( $r = -0.45$ ) between orientation selectivity and  
712 absolute values of LDB ( $t = -4.4$ ,  $df = 72$ ,  $p = 4 \times 10^{-5}$ ). These results suggest that a  
713 response bias towards dark stimuli might reduce a neuron's orientation selectivity (Figure  
714 7B), especially at the 0-13.3 and 13.3-26.7 ms latencies (Figure 7A).  
715  
716

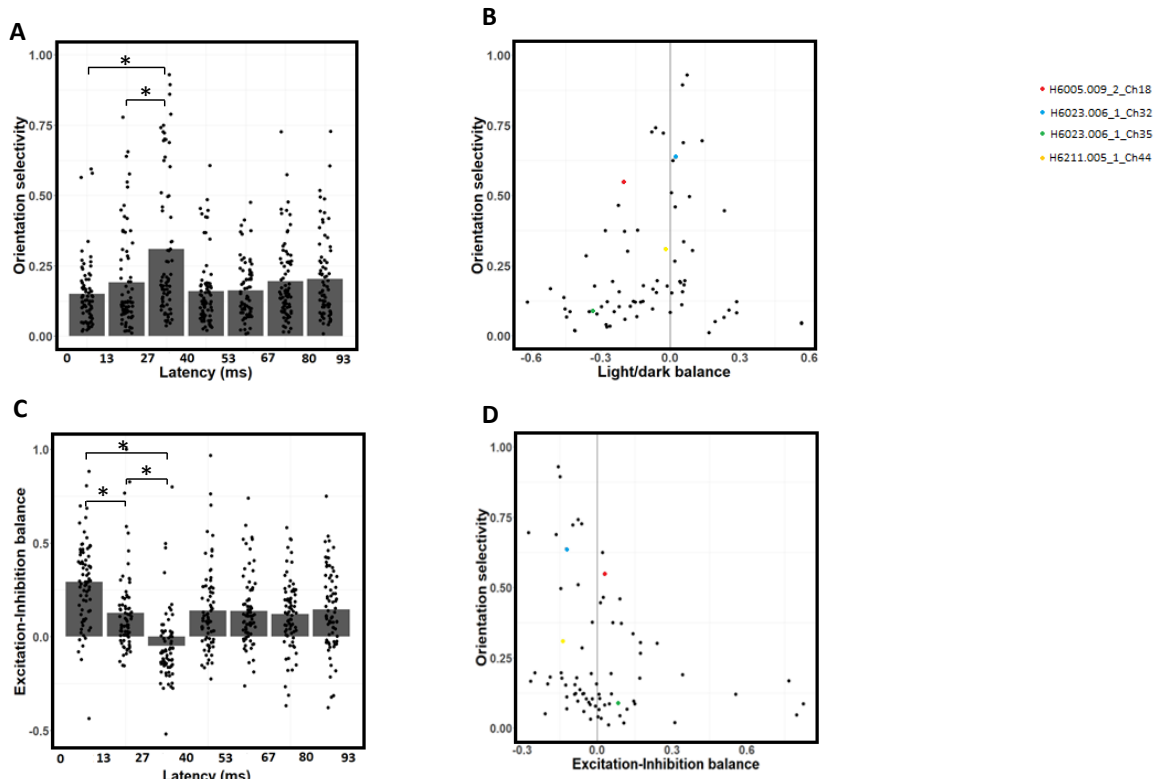

717

718 **Figure 7.** Changes in orientation selectivity and excitation-inhibition balance across latencies. **A**,  
719 Average orientation selectivity peaks at the 26.7-40 ms latency, and is relatively low at the 0-13.3  
720 and 13.3-26.7 ms latencies. **B**, Relationship between orientation selectivity (ordinate) and light-  
721 dark balance (abscissa). Neurons with higher orientation selectivity tend to be more balanced. **C**,

722 Excitation-Inhibition balance (EIB) index as a function of latency. Excitation is stronger than  
723 inhibition at the 0-13.3 and 13.3-26.7 ms latencies, while excitation and inhibition are relatively  
724 balanced at the 26.7-40 ms latency. **D**, Relationship between orientation selectivity (ordinate) and  
725 EIB (abscissa). Neurons with stronger excitation than inhibition tend to be less orientation  
726 selective. Significant paired t-tests (with Bonferroni correction,  $p < 0.0167$ ) between the first  
727 three latencies (0-40 ms) are shown by a star (\*) for *B* and *D*.

728

729 Another possible explanation for weaker orientation selectivity at early latencies  
730 could be faster excitation than inhibition (Ringach et al., 1997; Shapley et al., 2003).  
731 Figure 7C shows the relative amount of excitation vs. inhibition (EIB index; see  
732 Methods) at each latency. Excitation is stronger than inhibition at the 0-13.3 ms ( $t = 11.3$ ,  
733  $df = 73$ ,  $p < 2.2 \times 10^{-16}$ ) and 13.3-26.7 ms latencies ( $t = 5.08$ ,  $df = 73$ ,  $p = 2.8 \times 10^{-6}$ ),  
734 while there is no significant difference between excitation and inhibition at the 26.7-40  
735 ms latency ( $t = -2.3$ ,  $df = 73$ ,  $p = 0.025$ ). This bias towards excitation weakens over time,  
736 with lower EIB values for the 13.3-26.7 than for the 0-13.3 ms latency ( $t = 4.89$ ,  $df = 73$ ,  
737  $p = 5.73 \times 10^{-6}$ ). EIB values are also lower for the 26.7-40 than for the 13.3-26.7 ms  
738 latency ( $t = 7.44$ ,  $df = 73$ ,  $p = 1.58 \times 10^{-10}$ ). Also consistent with Ringach et al. (1997)  
739 and Shapley et al. (2003), we find a negative correlation of  $r = -0.26$  between orientation  
740 selectivity and EIB (Figure 7D;  $t = -4.87$ ,  $df = 72$ ,  $p = 6.25 \times 10^{-6}$ ). Overall, these results  
741 suggest that both dark-dominance and stronger excitation contribute to weaker orientation  
742 selectivity at early latencies. However, another interpretation might be that weaker OFF  
743 inhibition is responsible for all of the above phenomena at early latencies: stronger dark  
744 responses, weaker overall inhibition and weaker orientation selectivity (see Discussion).

745

## 746 **Discussion**

747           Using a novel model-fitting approach to natural image responses, we find V1  
748 neurons respond more strongly to dark than to light stimuli at early but not at later  
749 latencies, due to slower inhibition to dark than light stimuli. Dark-dominance occurs  
750 when inhibition is differentially recruited, for example when there is a light stimulus on  
751 the dark-driven region of a neuron's receptive field (or vice-versa). As can be seen in  
752 Figure 6 our results suggest little difference in the average neuron's firing rate when a  
753 light stimulus only covers the light-excited region of the receptive field (Figure 6A, red)  
754 compared to when a dark stimulus only covers the dark-excited region of the receptive  
755 field (Figure 6A, blue). At the 13.3-26.7 ms latency, stronger responses to dark stimuli  
756 are instead observed when light (Figure 6B, red) or dark (Figure 6B, blue) stimuli cover  
757 both the light and dark regions of a neuron's receptive field. These results could help  
758 explain why dark-dominance increases at lower spatial frequencies (Jansen et al., 2019),  
759 since a given light or dark band of a low-frequency grating may cover more than one  
760 region of a receptive field.

761

762

### 763 *Inference of excitation and inhibition from model-fitting*

764           We use a machine learning algorithm to fit a model based on separate ON and  
765 OFF retinogeniculate inputs to V1, each composed of linear filters followed by half-wave  
766 rectification. The weaker surrounds of LGN neurons (e.g. Croner & Kaplan, 1995) are  
767 omitted, to enable robust convergence on a set of fitted parameter values. Using this  
768 approach, we can distinguish between excitation and inhibition to light and dark stimuli

769 across spatial receptive field locations and temporal lags, to investigate how ON and OFF  
770 pathways contribute to the dark-dominance effect.

771 It is important to note that the excitation and inhibition we estimate does not  
772 necessarily reflect direct LGN inputs. For example, V1 does not receive direct inhibitory  
773 inputs from the LGN (Ferster & Lindström 1983, Martin & Whitteridge 1984; Montero,  
774 1986), but rather from local inhibitory interneurons, which in turn may relay geniculate  
775 inputs or be driven by other V1 neurons (Isaacson & Scanziani, 2011). Although V1  
776 neurons directly receive geniculate excitation, there is also intracortical excitation within  
777 V1 (Douglas et al., 1995). Moreover, what we estimate does not necessarily reflect the  
778 synaptic excitatory or inhibitory inputs a neuron directly receives. For example, a neuron  
779 could decrease its firing rate in response to light because its excitatory inputs are  
780 inhibited by light. Consequently, the estimated excitation and inhibition should best be  
781 interpreted as a measure of how a neuron's response varies as a function of light and dark  
782 stimuli, and not simply as synaptic weighting.

783 Distinguishing excitation to dark from inhibition to light (and vice-versa) has  
784 been enabled by the use of rich stimuli such as natural images, combined with our simple  
785 model architecture. Had we attempted to make the model more complex and biologically  
786 realistic, the results we obtain from the analysis might be more dependent on the  
787 particular sort of model we use and thus become problematic to interpret. Natural image  
788 stimuli lead to more robust system identification than with synthetic stimuli (Talebi &  
789 Baker, 2012), and perhaps more importantly, they ensure that neurons simultaneously  
790 receive visual stimuli that both increase and decrease their firing rate in different parts of

791 their receptive fields - this allows the machine learning algorithm to distinguish between  
792 excitation from one pathway and inhibition from the other.

793

794

795 *Dark-dominance due to weaker inhibition from dark stimuli*

796         Dark-dominance in V1 has previously been thought to originate from relatively  
797 greater lateral geniculate excitation from the OFF pathway (Jin et al., 2008). However,  
798 recent findings suggest dark-dominance might instead be caused by stronger intracortical  
799 inhibition from light than dark stimuli (Taylor et al., 2018). At each neuron's optimal  
800 latency, our results support the latter hypothesis by showing ON inhibition to be much  
801 stronger than OFF inhibition, while we do not find a significant difference between ON  
802 and OFF excitation.

803         These findings might help explain why dark-dominance is strongest in layer 2/3  
804 of primate V1 (Yeh et al., 2009). If dark-dominance were principally due to stronger  
805 lateral geniculate excitation from the OFF pathway, we would expect dark-dominance to  
806 be at least as strong in layer 4 than in the other layers, since this is where most LGN  
807 neurons synapse. While two-thirds of the neurons in primate layer 4 show dark-  
808 dominance, this effect is much stronger in layers 2/3 where almost every neuron is dark-  
809 dominant (Yeh et al., 2009). This laminar difference might be due to pyramidal neurons  
810 in primate layers 2/3 receiving extensive inhibition, as has been shown in the mouse  
811 (Kätzel et al., 2011), with inhibition being stronger to light than dark stimuli (Taylor et  
812 al., 2018).

813            Since this study utilized recordings from polytrodes that did not extend across all  
814 the cortical layers, a laminar analysis was not feasible. A useful future direction could be  
815 to replicate this experiment with linear-array probes to obtain simultaneous recording  
816 across all V1 layers, to investigate the laminar dependence of dark-dominance.

817

### 818 *Time dynamics of dark-dominance*

819            A novel finding of this study is how the dark-dominance changes as a function of  
820 latency. We observe the dark-dominance effect at the 0-13.3 and 13.3-26.7 latencies, but  
821 instead find a slight light-dominance at the 13.3-26.7 latency. We were able to find this  
822 relationship between latency and dark-dominance because we estimate and analyze light  
823 and dark responses at every latency for each neuron. Other studies have focused on each  
824 neuron's optimal latency (e.g. Yeh et al., 2009), which still clearly shows the dark-  
825 dominance effect (Figure 3) but neglects the effect of latency on the strength of dark  
826 responses. Consequently, dark responses were thought to be on average stronger in  
827 general, whereas we find this effect to be specific to the earlier latencies.

828            This relationship between dark-dominance and latency should not be too  
829 surprising, considering dark-dominant V1 neurons have previously been found to respond  
830 3-6 ms faster than light-dominant neurons (Komban et al., 2014). These faster dark  
831 responses in V1 have been attributed to faster OFF than ON LGN responses (Jin et al.,  
832 2008; Jin et al., 2011). While we do find the 0-13.3 ms latency to be dark-dominant due  
833 to stronger OFF than ON excitation (Figure 4B), most neurons have poor responses at  
834 this latency. The dark-dominance effect is most salient at the 13.3-26.7 ms latency, when  
835 response strength peaks and dark-dominance is due to weaker inhibition to dark stimuli

836 (Figure 4C). These results are consistent with findings from Taylor et al. (2018), who  
837 found intracortical inhibition to be stronger for light than for dark stimuli. Therefore, we  
838 interpret the dark-dominance results at each neuron's optimal time lag from Yeh et al.  
839 (2009) and Jansel et al. (2019) as mostly due to weaker inhibition rather than stronger  
840 excitation to dark stimuli.

841

#### 842 *Relationship to orientation selectivity*

843 This study also brings a new perspective on the intracortical mechanisms of  
844 orientation selectivity, and helps explain why V1 neurons are less orientation-selective in  
845 their early time lags (Ringach et al., 1997; Shapley et al., 2003). Due to the absence of  
846 direct inhibition from the LGN to V1 (Ferster & Lindström 1983, Martin & Whitteridge  
847 1984; Montero, 1986), the lagged onset of orientation selectivity was previously  
848 attributed to the delay imposed by the necessity of intracortical inhibitory interneurons  
849 (Ringach et al., 1997; Shapley et al., 2003). We do find inhibition strength to be  
850 positively correlated with orientation selectivity (Figure 7D; see Li, Yang, Liang, Xia &  
851 Zhou, 2008). However, we also find neurons with higher orientation selectivity to have  
852 more balanced light/dark responses (Figure 7B). Consistent with these results, responses  
853 from 0 to 26.7 ms, which are lower in orientation selectivity (Figure 7A), are also biased  
854 towards dark stimuli (Figure 4A) and have stronger excitation than inhibition (Figure  
855 7C). In contrast to the first two latencies, the 26.7-40 ms latency has high orientation  
856 selectivity (Figure 7A) and relatively balanced responses between light and dark stimuli  
857 (Figure 4A, 4D). Because both dark-dominance and stronger inhibition at the 13.3-26.7  
858 latency are due to slower inhibition to dark stimuli (Figure 4C), the reason why neurons



859 are less orientation selective at the 13.3-26.7 than at the 26.7-40 ms latency could  
860 possibly be due to this slower inhibition to dark stimuli.

861

## 862 *Conclusion*

863 In conclusion, we use a novel machine learning approach to bring new insights to  
864 the phenomenon of stronger dark responses in visual cortex neurons. We find the dark-  
865 dominance effect to only occur in the early latencies, and to be due to slower inhibition to  
866 dark stimuli. We also show how weaker average inhibition to dark stimuli is related to  
867 weaker orientation selectivity in the early latencies. The questions of how and why  
868 primary visual cortex neurons receive slower inhibition to dark than to light stimuli, and  
869 whether these findings vary across laminae, could be fruitful subjects of future  
870 investigation.

871

872

## 873 **References**

874 Anzai, A., Ohzawa, I., & Freeman, R. D. (1999). Neural mechanisms for processing  
875 binocular information I. Simple cells. *Journal of neurophysiology*, 82(2), 891-908.

876

877 Brainard, D. H. (1997) The Psychophysics Toolbox, *Spatial Vision* 10:433-436.

878

879 Buchner, A., & Baumgartner, N. (2007). Text-background polarity affects performance  
880 irrespective of ambient illumination and colour contrast. *Ergonomics*, 50(7), 1036-1063.

881

882 Cooper, E. A., & Norcia, A. M. (2015). Predicting cortical dark/bright asymmetries from  
883 natural image statistics and early visual transforms. *PLoS Comput Biol*, *11*(5), e1004268.

884

885 Croner, L. J., & Kaplan, E. (1995). Receptive fields of P and M ganglion cells across the  
886 primate retina. *Vision Research*, *35*(1), 7-24.

887

888 Douglas, R. J., Koch, C., Mahowald, M., Martin, K. A., & Suarez, H. H. (1995).

889 Recurrent excitation in neocortical circuits. *Science*, *269*(5226), 981-985.

890

891 Ferster, D., & Lindström, S. (1983). An intracellular analysis of geniculo-cortical

892 connectivity in area 17 of the cat. *The Journal of Physiology*, *342*(1), 181-215.

893

894 Hubel, D. H., & Wiesel, T. N. (1962). Receptive fields, binocular interaction and

895 functional architecture in the cat's visual cortex. *The Journal of physiology*, *160*(1), 106.

896

897 Isaacson, J. S., & Scanziani, M. (2011). How inhibition shapes cortical activity. *Neuron*,

898 *72*(2), 231-243.

899

900 Jansen, M., Jin, J., Li, X., Lashgari, R., Kremkow, J., Bereshpolova, Y., ... & Alonso, J.

901 M. (2019). Cortical balance between ON and OFF visual responses is modulated by the

902 spatial properties of the visual stimulus. *Cerebral Cortex*, *29*(1), 336-355.

903

- 904 Jin, J. Z., Weng, C., Yeh, C. I., Gordon, J. A., Ruthazer, E. S., Stryker, M. P., ... &  
905 Alonso, J. M. (2008). On and off domains of geniculate afferents in cat primary visual  
906 cortex. *Nature Neuroscience*, *11*(1), 88-94.
- 907
- 908 Jin, J., Wang, Y., Lashgari, R., Swadlow, H. A., & Alonso, J. M. (2011). Faster  
909 thalamocortical processing for dark than light visual targets. *Journal of*  
910 *Neuroscience*, *31*(48), 17471-17479.
- 911
- 912 Kätzel, D., Zemelman, B. V., Buetfering, C., Wölfel, M., & Miesenböck, G. (2011). The  
913 columnar and laminar organization of inhibitory connections to neocortical excitatory  
914 cells. *Nature Neuroscience*, *14*(1), 100-107.
- 915
- 916 Kingma, D. P., & Ba, J. (2014). Adam: A method for stochastic optimization. *arXiv*  
917 *preprint arXiv:1412.6980*.
- 918 Kleiner M, Brainard D, Pelli D, 2007, "What's new in Psychtoolbox-3?" Perception 36  
919 ECVF Abstract Supplement.
- 920 Komban, S. J., Alonso, J. M., & Zaidi, Q. (2011). Darks are processed faster than lights.  
921 *Journal of Neuroscience*, *31*(23), 8654-8658.
- 922
- 923 Komban, S. J., Kremkow, J., Jin, J., Wang, Y., Lashgari, R., Li, X., ... & Alonso, J. M.  
924 (2014). Neuronal and perceptual differences in the temporal processing of darks and  
925 lights. *Neuron*, *82*(1), 224-234.

926

927 Kremkow, J., Jin, J., Kombar, S. J., Wang, Y., Lashgari, R., Li, X., ... & Alonso, J. M.  
928 (2014). Neuronal nonlinearity explains greater visual spatial resolution for darks than  
929 lights. *Proceedings of the National Academy of Sciences*, *111*(8), 3170-3175.

930

931 Li, G., Yang, Y., Liang, Z., Xia, J., & Zhou, Y. (2008). GABA-mediated inhibition  
932 correlates with orientation selectivity in primary visual cortex of cat. *Neuroscience*,  
933 *155*(3), 914-922.

934

935 Li, M., Zhang, T., Chen, Y., & Smola, A. J. (2014, August). Efficient mini-batch training  
936 for stochastic optimization. In *Proceedings of the 20th ACM SIGKDD international*  
937 *conference on Knowledge discovery and data mining* (pp. 661-670).

938

939 Martin, K. A., & Whitteridge, D. (1984). Form, function and intracortical projections of  
940 spiny neurones in the striate visual cortex of the cat. *The Journal of Physiology*, *353*(1),  
941 463-504.

942

943 Mazade, R., Jin, J., Pons, C., & Alonso, J. M. (2019). Functional specialization of ON  
944 and OFF cortical pathways for global-slow and local-fast vision. *Cell Reports*, *27*(10),  
945 2881-2894.

946

- 947 Montero, V. M. (1986). The interneuronal nature of GABAergic neurons in the lateral  
948 geniculate nucleus of the rhesus monkey: a combined HRP and GABA-  
949 immunocytochemical study. *Experimental Brain Research*, 64(3), 615-622.  
950
- 951 Olmos, A., & Kingdom, F. A. (2004). A biologically inspired algorithm for the recovery  
952 of shading and reflectance images. *Perception*, 33(12), 1463-1473.  
953
- 954 Pascanu, R., Mikolov, T., & Bengio, Y. (2012). Understanding the exploding gradient  
955 problem. *CoRR*, *abs/1211.5063*, 2, 417.
- 956 Pelli, D. G. (1997) The VideoToolbox software for visual psychophysics: Transforming  
957 numbers into movies, *Spatial Vision* 10:437-442.
- 958 Persi, E., Hansel, D., Nowak, L., Barone, P., & Van Vreeswijk, C. (2011). Power-law  
959 input-output transfer functions explain the contrast-response and tuning properties of  
960 neurons in visual cortex. *PLoS Comput Biol*, 7(2), e1001078.  
961
- 962 Hoel, A. E., & Kennard, R. W. (1970). Ridge Regression Biased Estimation for  
963 Nonorthogonal Problem. *Technometrics*, 12(1), 55-67.  
964
- 965 Ratliff, C. P., Borghuis, B. G., Kao, Y. H., Sterling, P., & Balasubramanian, V. (2010).  
966 Retina is structured to process an excess of darkness in natural scenes. *Proceedings of the*  
967 *National Academy of Sciences*, 107(40), 17368-17373.  
968

- 969 Ringach, D. L., Sapiro, G., & Shapley, R. (1997). A subspace reverse-correlation  
970 technique for the study of visual neurons. *Vision Research*, 37(17), 2455-2464.  
971
- 972 Shapley, R., Hawken, M., & Ringach, D. L. (2003). Dynamics of orientation selectivity  
973 in the primary visual cortex and the importance of cortical inhibition. *Neuron*, 38(5), 689-  
974 699.  
975
- 976 Srivastava, N., Hinton, G., Krizhevsky, A., Sutskever, I., & Salakhutdinov, R. (2014).  
977 Dropout: a simple way to prevent neural networks from overfitting. *The Journal of*  
978 *Machine Learning Research*, 15(1), 1929-1958.  
979
- 980 Swindale, N. V. (1998). Orientation tuning curves: empirical description and estimation  
981 of parameters. *Biological cybernetics*, 78(1), 45-56.  
982
- 983 Swindale, N. V., & Spacek, M. A. (2014). Spike sorting for polytrodes: a divide and  
984 conquer approach. *Frontiers in Systems Neuroscience*, 8, 6.  
985
- 986 Talebi, V., & Baker, C. L. (2012). Natural versus synthetic stimuli for estimating  
987 receptive field models: a comparison of predictive robustness. *Journal of Neuroscience*,  
988 32(5), 1560-1576.  
989

990 Taylor, M. M., Sedigh-Sarvestani, M., Vigeland, L., Palmer, L. A., & Contreras, D.  
991 (2018). Inhibition in simple cell receptive fields is broad and OFF-subregion biased.  
992 *Journal of Neuroscience*, 38(3), 595-612.

993

994 Umesh, P. (2012). Image Processing in Python. *CSI Communications*, 23

995 Wörgötter, F., & Eysel, U. T. (1987). Quantitative determination of orientational and  
996 directional components in the response of visual cortical cells to moving  
997 stimuli. *Biological cybernetics*, 57(6), 349-355.

998

999 Yeh, C. I., Xing, D., & Shapley, R. M. (2009). “Black” responses dominate macaque  
1000 primary visual cortex v1. *Journal of Neuroscience*, 29(38), 11753-11760.

1001
